# Supplementary material for: Zelus renardii Roaming in Southern Italy
Source: MDPI journal article supplement (doi:10.3390/insects13020158), 2022-01-31
Supplement: s1 [file s1]

| Data       | Place | N  | SEX | P01 | P02 | P03 | P04 | P05 | P06 | P07 | P08 | P09 | P10 | P11 | P12 | Time sum | Pn |
|------------|-------|----|-----|-----|-----|-----|-----|-----|-----|-----|-----|-----|-----|-----|-----|----------|----|
| 2020 11 22 | Dept. | 1  | M   | 71  | 55  | 57  | 41  | 36  | 36  | 30  | 28  | 21  | 21  | 20  |     | 416      | 11 |
| 2020 11 22 | Dept. | 2  | M   | 63  | 51  | 49  | 42  | 44  | 39  | 32  | 33  | 26  | 23  | 19  | 19  | 440      | 12 |
| 2020 11 22 | Dept. | 3  | M   | 61  | 55  | 66  | 57  | 45  | 37  | 34  | 35  | 30  | 24  | 20  |     | 464      | 11 |
| 2020 11 22 | Dept. | 4  | M   | 59  | 62  | 59  | 44  | 41  | 34  | 34  | 28  | 26  | 23  | 21  | 15  | 446      | 12 |
| 2020 11 22 | Dept. | 5  | M   | 45  | 49  | 56  | 49  | 31  | 39  | 37  | 29  | 27  |     |     |     | 362      | 9  |
| 2020 11 22 | Dept. | 6  | M   | 62  | 56  | 45  | 50  | 39  | 34  | 38  | 29  | 28  | 25  | 23  |     | 429      | 11 |
| 2020 11 22 | Dept. | 7  | M   | 50  | 58  | 58  | 51  | 49  | 34  | 36  | 22  | 21  | 22  | 19  | 14  | 434      | 12 |
| 2020 11 22 | Dept. | 8  | M   | 56  | 52  | 57  | 45  | 46  | 43  | 44  | 28  | 22  | 27  | 21  | 20  | 461      | 12 |
| 2020 11 22 | Dept. | 9  | M   | 66  | 61  | 56  | 32  | 44  | 35  | 36  | 34  | 20  | 21  | 19  | 23  | 447      | 12 |
| 2020 11 22 | Dept. | 10 | M   | 72  | 54  | 66  | 45  | 43  | 40  | 44  | 29  | 35  | 20  | 18  | 16  | 482      | 12 |
| 2020 11 22 | Dept. | 11 | M   | 58  | 47  | 55  | 46  | 34  | 34  | 42  | 35  | 25  | 29  |     |     | 405      | 10 |

The table shows the raw data about *Zelus renardii* preying *Bactrocera oleae*. The data considers "Date" of predation; the "Place" considers the locations where trials were conducted; the "N" shows the progressive number used to identify the predator; the "SEX" reports the sexing of predators; the "P 01–12" reports the progressive number of *B. oleae* tested; the "Time Sum" accumulates the minutes' employees by each predator to feed all prey; the "Prey n" reports the total numbers of prey preyed. *M*= Male; *F*= Female and *Dept.* = Laboratory of Department. Data graphed the Fig.s 15 and 16.
