# Supplementary material for: Zelus renardii Roaming in Southern Italy
Source: MDPI journal article supplement (doi:10.3390/insects13020158), 2022-01-31
Supplement: s1 [file s1]

| Data       | Place | N  | M-F | Prey 01 | Prey 02 | Prey 03 | Prey 04 | Prey 05 | Prey 06 | Prey 07 | Prey 08 | Prey 09 | Prey 10 | Prey 11 | Prey 12 | Prey 13 | Prey 14 | Prey 15 | Time sum | Prey n |
|------------|-------|----|-----|---------|---------|---------|---------|---------|---------|---------|---------|---------|---------|---------|---------|---------|---------|---------|----------|--------|
| 2016 10 01 | Home  | 1  | M   | 105     | 47      | 42      | 90      | 60      | 41      | 34      | 20      | 9       | 8       | 11      | 1       | 2       | 1       | 2       | 473      | 15     |
| 2016 10 01 | Dept. | 2  | M   | 66      | 65      | 61      | 58      | 48      | 76      | 28      | 28      | 6       | 17      | 13      | 9       | 13      | 8       | 8       | 504      | 15     |
| 2016 10 03 | Dept. | 3  | F   | 73      | 68      | 59      | 62      | 58      | 77      | 43      | 22      | 12      | 10      | 9       | 12      |         |         |         | 505      | 12     |
| 2016 10 03 | Dept. | 4  | F   | 89      | 68      | 53      | 47      | 64      | 87      | 38      | 23      | 7       | 13      | 12      | 6       | 14      | 3       |         | 524      | 14     |
| 2016 10 03 | Dept. | 5  | F   | 71      | 51      | 58      | 48      | 68      | 43      | 56      | 25      | 8       | 22      | 15      | 10      | 12      |         |         | 487      | 13     |
| 2016 10 04 | Dept. | 6  | M   | 70      | 65      | 62      | 49      | 39      | 79      | 76      | 23      | 4       | 11      | 15      | 3       | 2       |         |         | 498      | 13     |
| 2016 10 04 | Dept. | 7  | M   | 73      | 61      | 65      | 56      | 21      | 89      | 49      | 18      | 3       | 10      | 12      | 9       | 3       | 2       | 5       | 476      | 15     |
| 2016 10 04 | Dept. | 8  | M   | 65      | 47      | 49      | 63      | 78      | 62      | 39      | 24      | 8       | 15      | 13      | 11      | 11      | 4       |         | 489      | 14     |
| 2016 10 05 | Dept. | 9  | M   | 58      | 40      | 38      | 29      | 44      | 57      | 25      | 21      | 12      | 11      | 15      |         |         |         |         | 350      | 11     |
| 2016 10 11 | Dept. | 10 | F   | 54      | 48      | 41      | 87      | 39      | 71      | 19      | 14      | 6       | 13      |         |         |         |         |         | 392      | 10     |
| 2016 10 11 | Dept. | 11 | M   | 74      | 57      | 52      | 43      | 76      | 62      | 28      | 18      | 12      | 13      | 14      | 6       | 6       | 8       | 2       | 471      | 15     |
| 2016 10 13 | Dept. | 12 | M   | 79      | 65      | 60      | 55      | 34      | 60      | 21      | 19      | 15      | 16      | 13      | 7       |         |         |         | 444      | 12     |
| 2016 10 13 | Dept. | 13 | M   | 67      | 53      | 61      | 39      | 75      | 67      | 44      | 20      | 11      | 14      | 11      | 15      | 9       | 10      |         | 496      | 14     |
| 2016 10 18 | Dept. | 14 | M   | 59      | 54      | 47      | 63      | 48      | 59      | 29      | 13      | 17      | 12      | 14      | 10      | 3       | 13      | 4       | 445      | 15     |
| 2016 10 22 | Home  | 15 | F   | 72      | 59      | 88      | 60      | 59      | 55      | 86      | 22      | 14      | 13      |         |         |         |         |         | 528      | 10     |
| 2016 10 22 | Home  | 16 | M   | 74      | 53      | 33      | 82      | 43      | 39      | 51      | 23      | 16      | 7       | 9       | 2       | 4       | 13      | 5       | 454      | 15     |
| 2016 10 24 | Dept. | 17 | F   | 69      | 68      | 53      | 72      | 91      | 60      | 37      | 45      | 11      | 14      | 11      | 4       | 8       | 14      |         | 557      | 14     |
| 2016 10 25 | Dept. | 18 | M   | 98      | 54      | 56      | 102     | 75      | 60      | 41      | 42      | 17      | 13      | 16      | 11      | 8       | 12      | 12      | 617      | 15     |
| 2016 10 25 | Dept. | 19 | M   | 90      | 49      | 46      | 72      | 56      | 44      | 25      | 24      | 22      | 3       | 12      | 9       | 5       | 15      | 3       | 475      | 15     |
| 2016 10 27 | Dept. | 20 | F   | 64      | 69      | 69      | 51      | 73      | 67      | 22      | 24      | 11      |         |         |         |         |         |         | 450      | 9      |
| 2016 10 29 | Home  | 21 | F   | 69      | 45      | 79      | 58      | 51      | 87      | 54      | 25      |         |         |         |         |         |         |         | 468      | 8      |

The table shows the raw data about *Zelus renardii* preying Aphrophoridae, Miridae and Issidae assemblage. The data considers "Date" of predation; the "Place" considers the locations where trials were conducted; the "N" shows the progressive number used to identify the predator; the "M-F" reports the sexing of predators; the "Prey 01–15" reports the progressive number of prey; the "Time Sum" accumulates the minutes' employees by each predator to feed all prey; the "Prey n" reports the total numbers of prey preyed. *M*= Male; *F*= Female and *Dept.* = Laboratory of Department. Data graphed the Fig.s 11 and 12.
