# Supplementary material for: Zelus renardii Roaming in Southern Italy
Source: MDPI journal article supplement (doi:10.3390/insects13020158), 2022-01-31
Supplement: s1 [file s1]

| Order & Family      | Species                                            | Reference | Approach     | Experiments |
|---------------------|----------------------------------------------------|-----------|--------------|-------------|
| Blatt. Blattidae    | <i>Periplaneta americana</i> (L., 1758)            | [51]      | Qualitative  | Lab         |
| Orth. Gryllidae     | <i>Acheta domesticus</i> (L., 1758)                | [51]      | Qualitative  | Lab         |
| Thys. Thripidae     | <i>Scirtothrips citri</i> (Moulton, 1909)          | [52]      | Qualitative  | Lab         |
|                     |                                                    | [53]      | Qualitative  | Lab         |
|                     | <i>Scirtothrips perseae</i> Nakahara, 1997         | [54]      | Qualitative  | Field       |
|                     | <i>Frankliniella occidentalis</i> Pergande, 1895   | [54]      | Qualitative  | Field       |
|                     | <i>Frankliniella insularis</i> Franklin, 1908      | [54]      | Qualitative  | Field       |
| Hem. Pseudococcidae | <i>Planococcus citri</i> (Risso, 1813)             | [53]      | Qualitative  | Lab         |
|                     | <i>Pseudococcus citriculus</i> Green, 1922         | [55]      | Qualitative  | Lab         |
|                     | <i>Ferrisia gilli</i> Gullan, 2003                 | [56]      | Qualitative  | Field       |
| Hem. Eriococcidae   | <i>Acanthococcus lagerstroemiae</i> (Kuwana, 1907) | [57]      | Qualitative  | Lab         |
| Hem. Psyllidae      | <i>Glycaspis brimblecombei</i> Moore, 1964         | [58]      | Qualitative  | Field       |
|                     |                                                    | [59]      | Qualitative  | Field       |
|                     | <i>Macrohymotoma gladiata</i> Kuwayama, 1908       | [6]       | Quantitative | Field       |
|                     |                                                    | [60]      | Qualitative  | Field       |
|                     | <i>Heteropsylla cubana</i> Crawford, 1914          | [61]      | Qualitative  | Field       |
| Hem. Liviidae       | <i>Diaphorina citri</i> Kuwayama, 1908             | [62]      | Qualitative  | Field       |
|                     |                                                    | [63]      | Quantitative | Field       |
|                     |                                                    | [64]      | Quantitative | Lab         |
|                     |                                                    | [65]      | Qualitative  | Field       |
|                     |                                                    | [66]      | Quantitative | Field       |
| Hem. Aleyrodidae    | <i>Bemisia tabaci</i> (Gennadius, 1889)            | [67]      | Qualitative  | Field       |
|                     |                                                    | [68]      | Quantitative | Field       |
|                     |                                                    | [69]      | Quantitative | Field       |
|                     |                                                    | [70]      | Quantitative | Field       |
|                     |                                                    | [71]      | Qualitative  | Field       |
| Hem. Aphididae      | <i>Therioaphis maculata</i> (Buckton, 1899)        | [15]      | Qualitative  | Field       |
|                     | <i>Aphis gossypii</i> Glover, 1877                 | [16]      | Quantitative | Field       |
|                     |                                                    | [17]      | Quantitative | Field       |
|                     |                                                    | [72]      | Quantitative | Lab         |
|                     |                                                    | [73]      | Quantitative | Field       |
|                     |                                                    | [74]      | Quantitative | Field       |
|                     | <i>Brachycaudus tragopogonis</i> (Kalt., 1843)     | [75]      | Quantitative | Field       |
|                     |                                                    | [62]      | Qualitative  | Field       |
|                     |                                                    | [76]      | Quantitative | Lab         |
|                     |                                                    | [76]      | Quantitative | Lab         |
|                     |                                                    | [76]      | Quantitative | Lab         |
| Hem. Cicadellidae   | <i>Macrosiphum pisi</i> (Harris, 1776)             | [77]      | Qualitative  | Lab         |
|                     | <i>Macrosiphum rosae</i> (L., 1758)                | [62]      | Qualitative  | Field       |
|                     |                                                    | [76]      | Quantitative | Lab         |
|                     | <i>Macrosiphum euphorbiae</i> L., 1758             | [76]      | Quantitative | Lab         |
|                     | <i>Myzus persicae</i> (Sulzer, 1776)               | [62]      | Qualitative  | Field       |
|                     |                                                    | [76]      | Quantitative | Lab         |
|                     | <i>Therioaphis maculata</i> (Buckton, 1899)        | [71]      | Qualitative  | Field       |
|                     | <i>Carneocephala</i> spp.                          | [77]      | Quantitative | Lab         |
|                     | <i>Draeculacephala</i> spp.                        | [77]      | Quantitative | Lab         |
|                     | <i>Acinopterus</i> spp.                            | [77]      | Quantitative | Lab         |
| Hem. Delphacidae    | <i>Aceratagalia</i> spp.                           | [77]      | Quantitative | Lab         |
|                     | <i>Homalodisca vitripennis</i> (Germar, 1821)      | [78]      | Quantitative | Lab         |
|                     |                                                    | [79]      | Quantitative | Lab         |
|                     |                                                    | [80]      | Quantitative | Lab         |
|                     |                                                    | [81]      | Quantitative | Lab         |
| Hem. Aphrophoridae  | <i>Philaenus spumarius</i> L., 1758                | [81]      | Quantitative | Lab         |
| Hem. Membracidae    | <i>Spissistilus festinus</i> (Say, 1866)           | [82]      | Qualitative  | Field       |
| Hem. Dictyopharidae | <i>Dictyophara europaea</i> (L., 1767)             | [51]      | Qualitative  | Lab         |
|                     | <i>Perkinsiella saccharicida</i> Kirkaldy, 1903    | [83]      | Qualitative  | Field       |
|                     |                                                    | [84]      | Qualitative  | Field       |
|                     |                                                    | [85]      | Qualitative  | Field       |
|                     |                                                    | [86]      | Qualitative  | Field       |
|                     |                                                    | [87]      | Qualitative  | Field       |
| Hem. Anthocoridae   | <i>Peregrinus maidis</i> (Ashmead, 1890)           | [88]      | Qualitative  | Field       |
|                     |                                                    | [89]      | Qualitative  | Field       |
|                     |                                                    | [90]      | Qualitative  | Field       |
|                     |                                                    | [91]      | Qualitative  | Field       |
|                     |                                                    | [17]      | Quantitative | Field       |

|                      |                                                          |       |              |       |
|----------------------|----------------------------------------------------------|-------|--------------|-------|
| Hem. Miridae         | <i>Pycnoderes quadrimaculatus</i> Guérin-Ménéville, 1857 | [90]  | Qualitative  | Field |
|                      |                                                          | [92]  | Qualitative  | Field |
|                      | <i>Lygus</i> spp.                                        | [77]  | Qualitative  | Field |
|                      |                                                          | [17]  | Quantitative | Field |
|                      |                                                          | [69]  | Quantitative | Field |
|                      |                                                          | [70]  | Quantitative | Field |
|                      | <i>Lygus hesperus</i> (Knight, 1917)                     | [72]  | Quantitative | Lab   |
|                      |                                                          | [93]  | Quantitative | Field |
|                      |                                                          | [94]  | Quantitative | Lab   |
|                      |                                                          | [95]  | Qualitative  | Field |
|                      |                                                          | [96]  | Quantitative | Field |
|                      |                                                          |       |              |       |
| Hem. Rhopalidae      | <i>Liorhyssus hyalinus</i> (Fabricius, 1794)             | [90]  | Qualitative  | Field |
|                      | <i>Geocoris</i> spp.                                     | [97]  | Quantitative | Field |
| Hem. Geocoridae      | <i>Geocoris punctipes</i> (Say, 1832)                    | [70]  | Quantitative | Field |
|                      | <i>Geocoris pallens</i> Stål, 1854                       | [17]  | Quantitative | Field |
|                      |                                                          | [18]  | Quantitative | Field |
|                      |                                                          | [98]  | Quantitative | Field |
| Hem. Plataspidae     | <i>Megacopta cribraria</i> (Fabricius, 1798)             | [99]  | Qualitative  | Field |
|                      |                                                          | [100] | Quantitative | Field |
| Hem. Pentatomidae    | <i>Chlorochroa ligata</i> (Say, 1832)                    | [101] | Qualitative  | Lab   |
|                      | <i>Euschistus servus</i> (Say, 1832)                     | [102] | Quantitative | Lab   |
|                      |                                                          | [103] | Quantitative | Lab   |
|                      | <i>Euschistus tristigmus</i> (Say, 1832)                 | [102] | Quantitative | Lab   |
|                      | <i>Euschistus impictiventris</i> Stål, 1872              | [104] | Qualitative  | Lab   |
|                      |                                                          | [51]  | Qualitative  | Lab   |
|                      | <i>Nezara viridula</i> L., 1758                          | [102] | Quantitative | Lab   |
|                      |                                                          | [105] | Quantitative | Lab   |
|                      | <i>Eurydema</i> spp.                                     | [51]  | Qualitative  | Lab   |
|                      |                                                          | [15]  | Quantitative | Field |
| Neur. Chrysopidae    |                                                          | [16]  | Quantitative | Field |
|                      |                                                          | [55]  | Qualitative  | Field |
|                      |                                                          | [106] | Qualitative  | Field |
|                      | <i>Chrysoperla carnea</i> Stephens, 1836                 | [107] | Qualitative  | Field |
|                      |                                                          | [108] | Qualitative  | Field |
|                      |                                                          | [109] | Quantitative | Field |
|                      |                                                          | [110] | Quantitative | Lab   |
|                      |                                                          | [111] | Quantitative | Lab   |
|                      | <i>Chrysoperla rufilabris</i> (Burmeister, 1839)         | [108] | Qualitative  | Field |
|                      | <i>Chrysopa nigricornis</i> Burmeister, 1839             | [15]  | Quantitative | Field |
|                      |                                                          | [108] | Quantitative | Field |
|                      | <i>Chrysopa oculata</i> Say, 1839                        | [108] | Qualitative  | Field |
|                      | <i>Chrysopa coloradensis</i> Banks, 1895                 | [108] | Qualitative  | Field |
| Lep. Limacodidae     | <i>Darna trima</i> Moore, 1859                           | [112] | Qualitative  | Field |
|                      |                                                          | [72]  | Quantitative | Lab   |
| Lep. Bucculatricidae | <i>Bucculatrix thurberiella</i> Busck, 1914              | [86]  | Quantitative | Lab   |
|                      |                                                          | [113] | Qualitative  | Lab   |
|                      |                                                          | [67]  | Quantitative | Lab   |
| Lep. Gelechiidae     | <i>Pectinophora gossypiella</i> (Saunders, 1844)         | [72]  | Quantitative | Lab   |
|                      |                                                          | [114] | Qualitative  | Lab   |
|                      |                                                          | [115] | Quantitative | Field |
| Lep. Tortricidae     | <i>Platynota stultana</i> Walsingham, 1884               | [116] | Qualitative  | Field |
| Lep. Papilionidae    | <i>Papilio zolocaon</i> Boisduval                        | [117] | Qualitative  | Field |
| Lep. Pieridae        | <i>Colias eurytheme</i> Boisduval, 1852                  | [77]  | Qualitative  | Lab   |
|                      | <i>Helicoverpa armigera</i> (Hübner, 1808)               | [118] | Qualitative  | Field |
|                      |                                                          | [72]  | Quantitative | Lab   |
|                      |                                                          | [119] | Quantitative | Field |
|                      | <i>Helicoverpa zea</i> (Boddie, 1850)                    | [120] | Quantitative | Lab   |
|                      |                                                          | [121] | Quantitative | Lab   |
| Lep. Noctuidae       |                                                          | [122] | Quantitative | Lab   |
|                      |                                                          | [120] | Quantitative | Lab   |
|                      |                                                          | [121] | Quantitative | Lab   |
|                      | <i>Heliothis virescens</i> (Fabricius, 1777)             | [123] | Qualitative  | Field |
|                      |                                                          | [124] | Quantitative | Lab   |
|                      |                                                          | [125] | Quantitative | Lab   |
|                      | <i>Spodoptera exigua</i> (Hübner, 1808)                  | [120] | Quantitative | Lab   |

|                    |                                                    |       |              |       |
|--------------------|----------------------------------------------------|-------|--------------|-------|
|                    |                                                    | [121] | Quantitative | Lab   |
|                    |                                                    | [125] | Quantitative | Lab   |
|                    |                                                    | [126] | Quantitative | Field |
|                    |                                                    | [127] | Quantitative | Lab   |
|                    | <i>Spodoptera praefica</i> (Grote, 1875)           | [128] | Qualitative  | Field |
|                    | <i>Spodoptera frugiperda</i> (Smith, 1797)         | [129] | Quantitative | Lab   |
|                    | <i>Trichoplusia ni</i> (Hübner, 1800–1803)         | [72]  | Quantitative | Lab   |
|                    |                                                    | [129] | Quantitative | Lab   |
| Lep. Geometridae   | <i>Anacamptodes fragilaria</i> Grossbeck, 1909     | [130] | Qualitative  | Field |
|                    |                                                    | [62]  | Qualitative  | Lab   |
| Dip. Drosophilidae | <i>Drosophila melanogaster</i> Meigen, 1830        | [77]  | Qualitative  | Lab   |
|                    |                                                    | [131] | Qualitative  | Lab   |
|                    | <i>Dacus cucurbitae</i> Coquillett, 1849           | [84]  | Qualitative  | Field |
| Dip. Tephritidae   |                                                    | [132] | Qualitative  | Field |
|                    | <i>Anastrepha ludens</i> Loew, 1873                | [62]  | Qualitative  | Lab   |
|                    | <i>Ceratitis capitata</i> Wiedemann, 1824          | [63]  | Qualitative  | Lab   |
|                    | <i>Adalia bipunctata</i> (L., 1758)                | [62]  | Qualitative  | Field |
|                    |                                                    | [76]  | Quantitative | Lab   |
|                    | <i>Cryptolaemus montrouzieri</i> Mulsant, 1850     | [62]  | Qualitative  | Field |
|                    |                                                    | [76]  | Quantitative | Lab   |
| Col. Coccinellidae | <i>Eriopis connexa</i> (Germar, 1824)              | [62]  | Qualitative  | Field |
|                    |                                                    | [76]  | Quantitative | Lab   |
|                    | <i>Hippodamia variegata</i> (Goeze, 1777)          | [62]  | Qualitative  | Field |
|                    |                                                    | [76]  | Quantitative | Lab   |
|                    | <i>Harmonia axyridis</i> (Pallas, 1773)            | [133] | Qualitative  | Field |
|                    | <i>Mimosestes sallaei</i> Sharp, 1885              | [134] | Qualitative  | Field |
|                    |                                                    | [135] | Qualitative  | Field |
| Col. Chrysomelidae | <i>Bruchus rufimanus</i> Boheman, 1833             | [136] | Quantitative | Field |
|                    |                                                    | [137] | Qualitative  | Field |
|                    | <i>Diorhabda elongate</i> Brullé, 1832             | [138] | Qualitative  | Field |
|                    | <i>Diabrotica undecimpunctata</i> Mannerheim, 1843 | [139] | Qualitative  | Field |
| Col. Curculionidae | <i>Anthonomus grandis grandis</i> Boheman, 1843    | [140] | Qualitative  | Field |
| Col. Melyridae     | <i>Collops vittatus</i> (Say, 1823)                | [70]  | Quantitative | Field |
| Hym. Scoliididae   | <i>Campsomeris marginella modesta</i> Smith, 1855  | [141] | Qualitative  | Field |
|                    | <i>Scolia manilae</i> (Ashmead, 1885)              | [141] | Qualitative  | Field |
| Hym. Apidae        | <i>Apis mellifera</i> L., 1758                     | [84]  | Qualitative  | Field |
|                    |                                                    | [141] | Qualitative  | Field |
| Hym. Aphelinidae   | <i>Aphytis</i> spp.                                | [142] | Qualitative  | Field |
|                    | <i>Aphytis aonidiae</i> Mercet, 1911               | [143] | Quantitative | Field |

*Zelus renardii* prey species preferences with order and family, the corresponding reference with the types of approach and experiments.
