# Supplementary material for: Zelus renardii Roaming in Southern Italy
Source: MDPI journal article supplement (doi:10.3390/insects13020158), 2022-01-31
Supplement: s1 [file s1]

| Egg-Batch | Date     | Mating time (min) | Days after mating (d) | Eggs laid | Eggs hatched | Embryonic development (d) |
|-----------|----------|-------------------|-----------------------|-----------|--------------|---------------------------|
| EB01      | 09/04/17 | 38                | 10                    | 21        | 21           | 12                        |
| EB02      | 06/08/17 | 35                | 66                    | 32        | 32           | 13                        |
| EB03      | 28/08/17 | 29                | 76                    | 29        | 26           | 20                        |
| EB04      | 30/08/17 | 31                | 6                     | 22        | 3            | 13                        |
| EB05      | 31/08/17 | 31                | 52                    | 23        | 14           | 27                        |
| EB06      | 01/09/17 | 32                | 70                    | 38        | 32           | 23                        |
| EB07      | 04/09/17 | 34                | 137                   | 21        | 16           | 13                        |
| EB08      | 06/09/17 | 35                | 70                    | 29        | 26           | 21                        |
| EB09      | 06/09/17 | 32                | 83                    | 30        | 28           | 23                        |
| EB10      | 06/09/17 | 34                | 71                    | 34        | 32           | 11                        |
| EB11      | 12/09/17 | 38                | 105                   | 19        | 7            | 18                        |
| EB12      | 11/10/17 | 34                | 123                   | 26        | 6            | 9                         |
| EB13      | 18/10/17 | 42                | 91                    | 29        | 27           | 23                        |
| EB14      | 08/11/17 | 43                | 124                   | 30        | 30           | 9                         |
| EB15      | 08/11/17 | 45                | 132                   | 32        | 22           | 14                        |
| EB16      | 08/11/17 | 45                | 139                   | 20        | 18           | 13                        |
| EB17      | 09/11/17 | 42                | 125                   | 21        | 21           | 16                        |
| EB18      | 09/11/17 | 36                | 83                    | 13        | 11           | 17                        |
| EB19      | 09/11/17 | 41                | 96                    | 30        | 3            | 22                        |
| EB20      | 16/11/17 | 39                | 143                   | 35        | 33           | 16                        |
| EB21      | 17/11/17 | 38                | 38                    | 21        | 13           | 29                        |
| EB22      | 17/11/17 | 31                | 57                    | 36        | 36           | 20                        |
| EB23      | 18/11/17 | 36                | 63                    | 21        | 20           | 22                        |
| EB24      | 18/11/17 | 34                | 72                    | 17        | 10           | 25                        |
| EB25      | 07/03/18 | 54                | 32                    | 11        | 11           | 21                        |
| EB26      | 08/03/18 | 34                | 90                    | 36        | 31           | 17                        |
| EB27      | 09/04/18 | 47                | 39                    | 23        | 22           | 17                        |
| EB28      | 09/04/18 | 37                | 29                    | 31        | 28           | 18                        |
| EB29      | 03/06/18 | 36                | 53                    | 48        | 48           | 12                        |
| EB30      | 04/06/18 | 29                | 57                    | 27        | 26           | 8                         |

The table shows the raw data about *Zelus renardii* mating. The data considers "Date" of mating; the "Mating time (min)" is the time in minutes spent for each couple to complete the mating; the "Days After Mating (d)" represent the days spent between mating and egg-laying; "Eggs Laid" represent the total number of eggs laid; the "Eggs Hatched" shows the total numbers of eggs hatched; the "Embryonic Development (d)" shows the days spent between eggs laying and eggs hatching. *EB*= Egg-Batch. Data graphed the Fig. 7.
