# Supplementary material for: Zelus renardii Roaming in Southern Italy
Source: MDPI journal article supplement (doi:10.3390/insects13020158), 2022-01-31
Supplement: s1 [file s1]

Tabella 1

| N  | Interactions Sec | AM track (mm) | ZR track (mm) | AM mm/sec | ZR mm/sec | Interaction                                                                                                             |
|----|------------------|---------------|---------------|-----------|-----------|-------------------------------------------------------------------------------------------------------------------------|
| 1  | 43s              | 965           | 729           | 22        | 17        | 1 - reciprocal ignorance, wandering around in the Petri                                                                 |
| 2  | 45s              | 1032          | 838           | 23        | 19        | 1 - reciprocal ignorance, wandering around in the Petri                                                                 |
| 3  | 46s              | 187           | 708           | 4         | 15        | 1 - reciprocal ignorance, wandering around in the Petri                                                                 |
| 4  | 118s             | 76            | 515           | 1         | 4         | 1 - reciprocal ignorance, wandering around in the Petri                                                                 |
| 5  | 36s              | 0             | 100           | 0         | 3         | 1 - reciprocal ignorance, wandering around in the Petri                                                                 |
| 6  | 31s              | 0             | 163           | 0         | 5         | 1 - reciprocal ignorance, wandering around in the Petri                                                                 |
| 7  | 12s              | 0             | 43            | 0         | 4         | 1 - reciprocal ignorance, wandering around in the Petri                                                                 |
| 8  | 30s              | 0             | 0             | 0         | 0         | 2 - staying almost immotile near or on the release spot                                                                 |
| 9  | 387s             | 0             | 3947          | 0         | 10        | 1 - reciprocal ignorance, wandering around in the Petri                                                                 |
| 10 | 39s              | 0             | 56            | 0         | 1         | 1 - reciprocal ignorance, wandering around in the Petri                                                                 |
| 11 | 56s              | 0             | 158           | 0         | 3         | 1 - reciprocal ignorance, wandering around in the Petri                                                                 |
| 12 | 123s             | 0             | 1469          | 0         | 12        | 1 - reciprocal ignorance, wandering around in the Petri                                                                 |
| 13 | 58s              | 0             | 654           | 0         | 11        | 1 - reciprocal ignorance, wandering around in the Petri                                                                 |
| 14 | 2251s            | 308           | 293           | 0         | 0         | 5 - AM glues on LAB sticking legs that attacks and kills the honeybee defencing itself                                  |
| 15 | 5s               | 0             | 94            | 0         | 19        | 1 - reciprocal ignorance, wandering around in the Petri                                                                 |
| 16 | 124s             | 30            | 27            | 0         | 0         | 1 - reciprocal ignorance, wandering around in the Petri                                                                 |
| 17 | 26s              | 41            | 59            | 2         | 2         | 1 - reciprocal ignorance, wandering around in the Petri                                                                 |
| 18 | 6s               | 0             | 74            | 0         | 12        | 1 - reciprocal ignorance, wandering around in the Petri                                                                 |
| 19 | 133s             | 1182          | 1065          | 9         | 8         | 3 - AM walks or flutters versus the escaping LAB; 4 - AM accidentally collide with LAB eliciting its aggressive posture |

The table shows the raw data about *Zelus renardii* and *Apis mellifera* interaction. The "N" shows the progressive number used to identify the interaction between *Z. renardii* and *A. mellifera*; the "Interactions Sec" reports the time in seconds of each interaction; the "AM track (mm)" shows the distance travelled by *A. mellifera* in the arena expressed in millimetres; the "ZR track (mm)" shows the distance travelled by *Z. renardii* in the arena noted in millimetres; the "AM mm/sec" reports the average speed of the *A. mellifera* during interaction with the predator; the "ZR mm/sec" reports the average speed of the *Z. renardii* during interaction with the pollinator; the "Interaction" notes the behaviour of *Z. renardii* and *A. mellifera* during trials. Data graphed in Figs 19 and 20.
